# Supplementary material for: Microbial lipid production from AFEX™ pretreated corn stover
Source: Royal Society of Chemistry journal article supplement (doi:10.1039/c5ra01134e), 2015-01-01
Supplement: c5ra01134e1.pdf [file c5ra01134e1.pdf]

## Supplemental material

### Microbial lipid production from AFEX™ pretreated corn stover

Ya-Ping Xue<sup>1,2</sup>, Mingjie Jin<sup>1,3\*</sup>, Andrea Orjuela<sup>1,3</sup>, Patricia J. Slininger<sup>4</sup>, Bruce S. Dien<sup>4</sup>, Bruce E. Dale<sup>1,3</sup>, Venkatesh Balan<sup>1,3</sup>

<sup>1</sup>Biomass Conversion Research Laboratory (BCRL), Department of Chemical Engineering and Materials Science, Michigan State University, MBI Building, 3815 Technology Boulevard, Lansing, MI 48910, USA.

<sup>2</sup>Institute of Bioengineering, Zhejiang University of Technology, Hangzhou 310014, China.

<sup>3</sup>DOE Great Lakes Bioenergy Research Center (GLBRC), Michigan State University, East Lansing, MI 48824, USA.

<sup>4</sup>National Center for Agricultural Utilization Research, USDA-ARS, Peoria IL 61604.

\*Corresponding author: Phone: +1 517 432 0157, E-mail address:  
[jinmingj@egr.msu.edu](mailto:jinmingj@egr.msu.edu) (Jin, M)

## Supplemental Figures

**Supplemental Figure S1** Dilution of hydrolysate improved lipid production by *Lypomyces* sp. fermentation. AFEX-CS hydrolysate derived from 6.0% glucan loading enzymatic hydrolysis was diluted by 1.25-fold (40 mL hydrolysate was diluted to 50 mL), 1.67-fold (30 mL hydrolysate was diluted to 50 mL), and 2.50-fold (20 mL hydrolysate was diluted to 50 mL). Glucose and xylose were supplemented to the diluted hydrolysates to make final sugar concentrations the same as in undiluted hydrolysate (glucose:56.5 g/L, xylose:30.5 g/L). Fermentations were performed at 27 °C and initial pH 5.5.

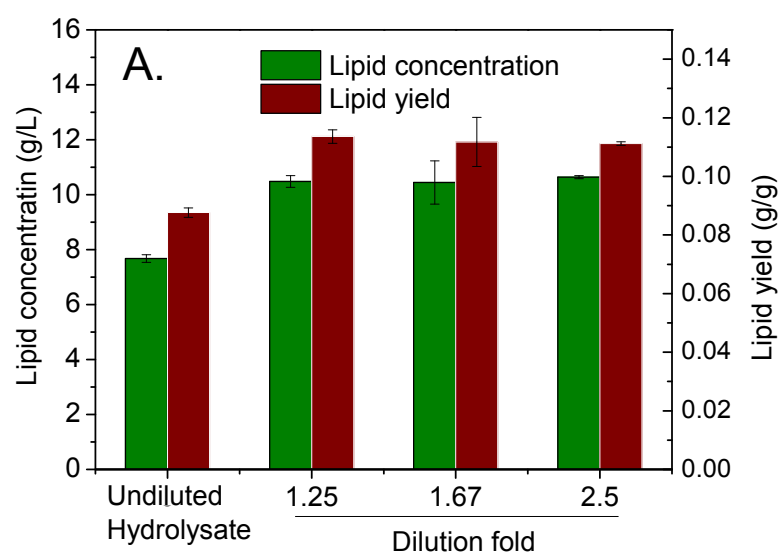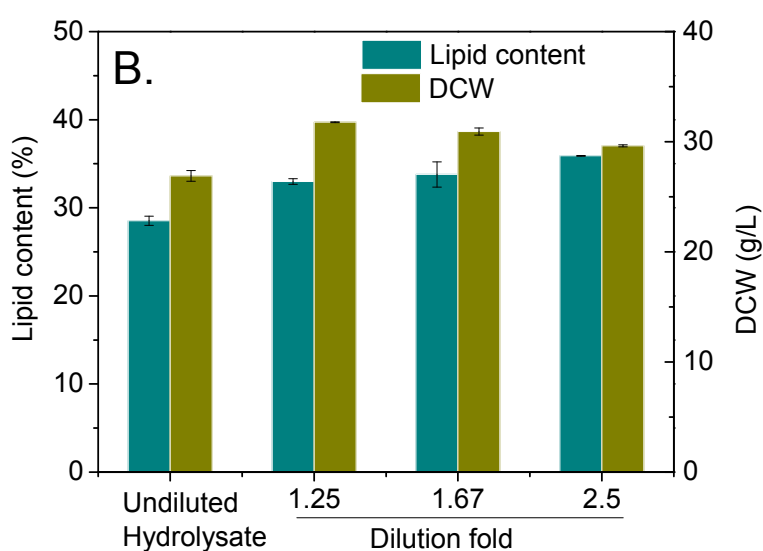

**Supplemental Table S1** Major degradation products in AFEX-CS hydrolysate (7.5% glucan loading). The degradation products were analyzed and published in a previous study<sup>6</sup>. The concentrations were calculated based on published data<sup>6</sup>.

| Degradation products                     | 7.5 % glucan loading<br>AFEX-CS hydrolysate<br>(g/L) |
|------------------------------------------|------------------------------------------------------|
| 5-Hydroxymethyl furfural (HMF)           | 0.1555                                               |
| Lactic acid                              | 0.0770                                               |
| Aconitic acid                            | 0.9188                                               |
| Acetic acid                              | 1.1168                                               |
| Formic acid                              | 0.2209                                               |
| Acetamide                                | 6.0659                                               |
| Total phenolic amides                    | 3.5758                                               |
| Total pyrazine and imidazole derivatives | 0.2289                                               |
| 4-hydroxybenzaldehyde                    | 0.0225                                               |
| Vanillin                                 | 0.0472                                               |
| p-coumaric acid                          | 0.2616                                               |
| Ferulic acid                             | 0.0250                                               |

(<sup>6</sup>Chundawat et al, Bioresource Technology, 2010, 101:8429-8438.)
